# Supplementary material
Source: PubMed Central journal article supplement (PMC8084921)
Supplement: NIHMS1661279-supplement-1.pdf [file NIHMS1661279-supplement-1.pdf]

**Title: Impact of Adjunctive Clindamycin in Invasive  $\beta$ -hemolytic Streptococcal Infections: A Retrospective Cohort Analysis of 1956  $\beta$ -lactam Treated Patients from 118 US Hospitals, 2000-2015**

**Authors:** Ahmed Babiker, Xiaobai Li, Yi Ling Lai, Jeffery R. Strich, Sarah Warner, Sadia Hussain, John P. Dekker, Robert L. Danner, Sameer S. Kadri

## Online data supplement

### e-Appendix

e-Appendix 1

e-Appendix 2

e-Appendix 3

e-Appendix 4

e-Appendix 5

e-Appendix 6

e-Appendix 7

e-Appendix 8

e-Appendix 9

e-Appendix 10

e-Appendix 11

### Data Specifications

Methods: Case Selection

Methods: Study Comorbidities and Conditions of Interest

Methods: Study Medications

Methods: SOFA Score

Methods: Analysis

Results: Overall Cohort Baseline Characteristics

Results: Sensitivity Analysis, Odds Ratio of In-Hospital Mortality Using Generalized Estimating Equations

Results: Mortality over Time

Results: Clindamycin Resistance

Results: Literature Review

References

### Appendix Tables

Table E1

Infection Site ICD-9-CM Codes

Table E2

ICD-9-CM Codes for Comorbidities/Conditions of Interest

Table E3

ICD-9-CM Codes for Immunosuppressed Algorithm

Table E4

ICD-9 Procedure Codes for Surgical Debridement and/or Amputation

Table E5

Study Medication

Table E6

Baseline Characteristics of All Patients with Invasive  $\beta$ -Hemolytic Streptococcal Infection

Table E7

Mortality over Time

Table E8

Studies Examining Clinical Efficacy of Adjunctive Clindamycin in i $\beta$ HS

## **e-Appendix 1: Methods: Case Selection**

The *Cerner Healthfacts*<sup>TM</sup> Database was queried for inpatients with any positive clinical cultures between 2000 and 2015 which grew  $\beta$ HS species of interest (see below) and received a  $\beta$ -lactam antibiotic (Supplementary data Table E5) within  $\pm 3$  days of culture sampling. This group was then queried for patients who also received clindamycin within  $\pm 3$  days of culture sampling. Patient's with polymicrobial growth in culture and missing variables were excluded.

“Proven”  $i\beta$ HS infection was defined as isolation of  $\beta$ HS from a normally sterile body sites, or as per the U.S. Centers of Diseases Control and Prevention <sup>1</sup> definitions, isolation of  $\beta$ HS from a deep wound in conjunction with International Classification of Diseases Version 9 (ICD-9) code of STSS (040.82) or NF (728.86, 0.40) <sup>1</sup>. “Probable”  $i\beta$ HS infection was defined as isolation of  $\beta$ HS from a non-sterile site with ICD codes for lower respiratory, genitourinary, skin and soft tissue and musculoskeletal, intra-abdominal or other deep-seated infections as was the source of secondary bacteremia cases. (Supplementary data Table E1).

Culture sterility was deemed by using guidance from CDC definitions. Culture sterility designation was based on culture collection source and culture procedure name in Cerner data set and coded as such by AB and reviewed independently by and JS and SK.

### **Invasive $\beta$ -Hemolytic Streptococcus Species included in Analysis (N=1956)**

#### **Group A streptococci (GAS):**

*Streptococcus pyogenes* (Group A *Streptococcus*) (N=1079)

#### **Non-group A, non-group B $\beta$ -hemolytic streptococci (NABS):**

$\beta$ -hemolytic streptococci, Group G (N=511)

$\beta$ -hemolytic streptococci, Group C (N=281)

$\beta$ -hemolytic streptococci, not Grp A,B (N=32)

*Streptococcus dysgalactiae* (N=27)

*Streptococcus equi* (ss equi) (N=2)

*Streptococcus equi* ss *zooepidemicus* (N=1)

*Streptococcus equisimilis* (N=22)

*Streptococcus iniae* (N=1)

**Table E1: Infection Site ICD-9-CM Codes**

| <b>Clinical Syndrome/Variable</b>                              | <b>ICD 9 codes</b>                                                                                                                                                                                                                                                                                                                                                                                                                                                                                                                                                                                                                                                                                                                                                                                                                                                                                                                                                                                                                                                                                   |
|----------------------------------------------------------------|------------------------------------------------------------------------------------------------------------------------------------------------------------------------------------------------------------------------------------------------------------------------------------------------------------------------------------------------------------------------------------------------------------------------------------------------------------------------------------------------------------------------------------------------------------------------------------------------------------------------------------------------------------------------------------------------------------------------------------------------------------------------------------------------------------------------------------------------------------------------------------------------------------------------------------------------------------------------------------------------------------------------------------------------------------------------------------------------------|
| <b>Necrotizing soft tissue infection/Necrotizing Fasciitis</b> | 728.86, 0.40,                                                                                                                                                                                                                                                                                                                                                                                                                                                                                                                                                                                                                                                                                                                                                                                                                                                                                                                                                                                                                                                                                        |
| <b>Shock</b>                                                   | 785.52, 785.50                                                                                                                                                                                                                                                                                                                                                                                                                                                                                                                                                                                                                                                                                                                                                                                                                                                                                                                                                                                                                                                                                       |
| <b>Streptococcal toxic shock syndrome (STSS)</b>               | 040.82                                                                                                                                                                                                                                                                                                                                                                                                                                                                                                                                                                                                                                                                                                                                                                                                                                                                                                                                                                                                                                                                                               |
| <b>Respiratory Infection</b>                                   | 020.3 020.4 020.5 021.2 022.1 039.1 052.1 055.1 073.0, 079.6, 464.1x (464.10, 464.11), 466x (466.0 466.1 466.11 466.19, 480x (480.0-480.3, 480.8, 480.9), 481, 482x (482.0-482.3, 482.30-482.32, 482.39, 482.40-482.42, 482.49, 482.81-482.84 , 482.89, 482.9), 483x(483.0, 483.1 483.8) 484x (484.1, 484.3, 484.5, 484.6, 484.7, 484.8) 485, 486, 487x (487.0,487.1, 487.8), 488x (488.01, 488.02,488.09,488.11, 488.12,488.19, 488.8,488.81,488.82,488.89), 490.0, 507.0 510.x(510.0,510.9), 513x (513.0, 513.1) , 997.3x (997.31, 997.32)                                                                                                                                                                                                                                                                                                                                                                                                                                                                                                                                                         |
| <b>SSTI/MSK</b>                                                | 035, 039.0, 373.0x (373.00, 373.01, 373.02) 373.4, 376.01 566, 680.0-686.9 (680.0, 680.1, 680.2, 680.3 680.4 680.5 680.6 680.7 680.8 680.9 681.00 681.01 681.02 681.10 681.11 681.9 682.0 682.1 682.2 682.3 682.4 682.5 682.6 682.7 682.8 682.9 684, 685.0 685.1 686.0 686.00 686.01 686.09 686.1 686.8 686.9) , 695.3, 910.1, 910.3, 910.5, 910.7, 910.9, 911.1, 911.3, 911.5, 911.5, 911.7, 911.9, 912.1, 912.3, 912.5, 912.7, 912.7, 912.9, 913.1, 913.3, 913.5, 913.7, 913.9, 914.1, 914.3, 914.5, 914.7, 914.9, 915.1, 915.3, 915.3, 915.5, 915.7, 915.9, 916.1, 916.3, 916.5, 916.7, 916.9, 917.1, 917.3, 917.5, 917.7, 917.9, 919.1, 919.3, 919.5, 919.7, 919.9 , 997.62, 998.51, 036.82, 376.01, 376.02, 376.03,,711.0x (711.00-711.09), 711.4x (711.40-711.49), 711.8x (711.90-711.89), 711.9x (711.90-711.99) , 730.0x (730.00-730.09), 726.3x (726.30, 726.31, 726.32, 726.33, 726.39) 726.6x (726.60-726.69), 726.7x (726.70-726.79) 728.0, 729.4, 730.1x (730.10-730.19), 730.2x (730.20-730.29), 730.3x(730.30-730.39), 730.8x (730.80-730.89), 730.9x (730.90-730.99), 996.66, 996.67 |

|                                       |                                                                                                                                                                                                                                                                                                                                                                                                |
|---------------------------------------|------------------------------------------------------------------------------------------------------------------------------------------------------------------------------------------------------------------------------------------------------------------------------------------------------------------------------------------------------------------------------------------------|
|                                       |                                                                                                                                                                                                                                                                                                                                                                                                |
| <b>Genitourinary/Puerperal sepsis</b> | 597x (597.0-597.89), 601x (601.0-601.9), 603.1, 604x (604.0-604.99), 614x (614.0-614.9), 615x (615.0-615.9), 639.0, 646.x (646), 670x (670.0-670.8)                                                                                                                                                                                                                                            |
| <b>CNS Infections</b>                 | 027.0, 036.0, 047x (047.1, 047.8, 047.9), 049.x (049.0, 049.1, 049.8, 049.9), 053.0, 072.1, 100.81, 112.83, 114.2, 115.01, 115.11, 115.91, 320.x (320.0-320.9), 321x (321.0-321.4, 321.8) 0- 322.0, 322.9, 323.4, 324x (324.0, 324.1, 324.9), 325                                                                                                                                              |
| <b>Intra-abdominal Infection</b>      | 009x (009.0-009.3), 540x (540.0-540.9) 541, 542, 562.01 562.03 562.11 562.13 567x (567.0-567.9), 569.83, 569.5, 569.61, 569.71, 572x (572.0-572.8), 574.0x(574.00-574.01), 574.1x (574.10-574.11), 574.3x (574.30-574.31), 574.4x (574.40-574.41), 574.6(574.60-574.61), 574.7x(574.70-574.91), 574.8x (574.80-574.81), 575.0, 575.1x (575.10-575.12), 575.4, 576.1, 590x(590.0-590.9), 996.68 |
| <b>Other Deep infection/Abscess*</b>  | 513.1, 527.3, 519.2, 604.9, 567.38, 478.22, 522.5, 475, 478.24                                                                                                                                                                                                                                                                                                                                 |
| <b>Primary Bacteremia</b>             | 036.42, 421x (421.0-421.9), 422.92, 423.8, 423.9, 424.9x( 425.90-91), All other codes                                                                                                                                                                                                                                                                                                          |

\* Other deep infections:

- a. Mediastinitis
- b. Orchitis/epididymitis
- c. Parapharyngeal abscess
- d. Periapical abscess
- e. Peritonsillar abscess
- f. Retropharyngeal abscess
- g. Abscess of Mediastinum
- h. Abscess of Salivary Gland

## e-Appendix 2: Methods: *Study Comorbidities and Conditions of Interest*

The Elixhuaser was score calculated using ICD-9-CM codes <sup>2</sup>

**Table E2: ICD-9-CM Codes for Comorbidities/Conditions of Interest**

| Comorbidities/Conditions of interest | ICD codes                                                                                                                            |
|--------------------------------------|--------------------------------------------------------------------------------------------------------------------------------------|
| DM                                   | 250.0–250.3, 250.4–250.9                                                                                                             |
| Congestive Heart Failure             | 398.91, 402.01, 402.11, 402.91, 404.01, 404.03, 404.11, 404.13, 404.91, 404.93, 425.4–425.9, 428.x                                   |
| Atherosclerotic Heart disease        | 410.x, 412.x                                                                                                                         |
| Chronic Lung Disease                 | 416.8, 416.9, 490.x–505.x, 506.4, 508.1, 508.8                                                                                       |
| Moderate to Severe Liver Disease     | 456.0–456.2, 572.2–572.8                                                                                                             |
| Malignancy                           | 140.x–172.x, 174.x–195.8, 196.x–199.x<br>200.x–208.x, 238.6 (doesn't include skin malignancy)                                        |
| CKD/ESRD                             | 403.01, 403.11, 403.91, 404.02, 404.03, 404.12, 404.13, 404.92, 404.93, 582.x, 583.0–583.7, 585.x, 586.x, 588.0, V42.0, V45.1, V56.x |
| Cerebrovascular disease              | 362.34, 430.x–438.x                                                                                                                  |
| Obesity                              | 278.0                                                                                                                                |
| Smoking/Tobacco use                  | V15.82, 305.1                                                                                                                        |
| Alcohol abuse                        | 265.2, 291.1–291.3, 291.5–291.9, 303.0, 303.9, 305.0, 357.5, 425.5, 535.3, 571.0–571.3, 980.x, V11.3                                 |
| Drug Abuse                           | 292.x, 304.x, 305.2–305.9, V65.42                                                                                                    |
| Obesity                              | 278.0                                                                                                                                |

| <b>Acute Skin Breakdown</b>           |                                                                                                                                                                                                                                                                                                                                                                                                               |                                                                                                                                                                                                                                                                                                                                           |
|---------------------------------------|---------------------------------------------------------------------------------------------------------------------------------------------------------------------------------------------------------------------------------------------------------------------------------------------------------------------------------------------------------------------------------------------------------------|-------------------------------------------------------------------------------------------------------------------------------------------------------------------------------------------------------------------------------------------------------------------------------------------------------------------------------------------|
| Burns                                 | 906.5, 906.6, 906.7, 906.8, 906.9, 941.0, 941.1, 941.2, 941.3, 941.4, 941.5, 942.0, 942.1, 942.2, 942.3, 942.4, 942.5, 943.0, 943.1, 943.2, 943.3, 943.4, 943.5, 944.0, 944.1, 944.2, 944.3, 944.4, 944.5, 945.0, 945.1, 945.2, 945.3, 945.4, 945.5, 946.0, 946.1, 946.2, 946.3, 946.4, 946.5, 948.0, 948.1, 948.2, 948.3, 948.4, 948.5, 948.6, 948.7, 948.8, 948.9, 949.0, 949.1, 949.2, 949.3, 949.4, 949.5 |                                                                                                                                                                                                                                                                                                                                           |
| Blunt/Penetrating Trauma <sup>3</sup> | Head/face/neck                                                                                                                                                                                                                                                                                                                                                                                                | 873(.0-.1,.8-9), 941.x6, 951, 959.01, 802, 830, 848(.0-.1), 872, 873(.2-.7), 941(.x1,.x3-.x5,.x7) , 807(.5-.6), 848.2, 874, 925.2, 941.x8, 953.0, 954.0 900, 910, 920, 925.1, 941(.x0, .x9), 947.0, 957.0, 959.09. 870-871, 918, 921, 940, 941.x2, 950(.0,.9)                                                                             |
|                                       | Chest /Abdomen/<br>Trunk/Back                                                                                                                                                                                                                                                                                                                                                                                 | 807(.0-.4), 839(.61,.71), 848(.3-.4), 860-862, 875, 879(.0-.1), 901, 922(.0-.1,.33), 926.19, 942(.x1-.x2), 953.1 , 863-866, 868, 879(.2-.5), 902(.0-.4), 922.2,942.x3, 947.3, 953(.2,.5) , 809, 879(.6-.7), 911, 922(.8-9), 926(.8-9), 942(.x0,.x9), 954(.1,.8-9), 959.1 , 847.9, 876, 922(.31-.32), 926.11, 942.x4                       |
|                                       | Upper Extremity                                                                                                                                                                                                                                                                                                                                                                                               | 810-812, 831, 840, 880, 887(.2-.3), 912,923.0, 927.0, 943(.x3-.x6) ,959.2, 813, 832, 841, 881(.x0-.x1), 887(.0-.1), 923.1, 927.1, 943(.x1-.x2), 814-817, 833-834, 842,881.x2, 882, 883, 885-886, 914-915, 923(.2-.3) ,927(.2-.3), 944 ,959(.4-.5) , 818, 884, 887(.4-.7), 903, 913, 923(.8-9), 927(.8-9), 943(.x0,.x9), 953.4, 955, 959.3 |
|                                       | Lower Extremity                                                                                                                                                                                                                                                                                                                                                                                               | 820, 835, 843, 924.01, 928.01 , 821, 897(.2-.3), 924.00, 928.00, 945.x6 822, 836, 844(.0-.3), 924.11, 928.11, 945.x5, 823-824, 837, 845.0, 897(.0-.1), 924(.10,.21), 928(.10,.21), 945(.x3-.x4), 825-826, 838, 845.1, 892-893,                                                                                                            |

|                                      |                                                                                  |                                                                                                                                                                                               |
|--------------------------------------|----------------------------------------------------------------------------------|-----------------------------------------------------------------------------------------------------------------------------------------------------------------------------------------------|
|                                      |                                                                                  | 895–896, 917, 924(.3,.20), 928 (.3,.20), 945 (.x1–.x2), 827,844(.8–.9), 890–891, 894, 897(.4–.7), 904(.0–.8), 916, 924(.4–.5), 928(.8–.9), 945(.x0,.x9), 959(.6–.7)                           |
|                                      | Unspecified or Multiple sites                                                    | 819, 828, 902(.87,.89), 947(.1–.2), 953.8, 956, 829, 839(.8–.9), 848(.8–.9), 869, 879(.8–.9), 902.9, 904.9, 919, 924(.8–.9), 929, 946, 947(.8–.9), 948, 949, 953.9, 957(.1,.8–.9), 959(.8–.9) |
| Varicella                            | 052.9, 052.7, 052.8                                                              |                                                                                                                                                                                               |
| <b>Chronic Skin breakdown</b>        |                                                                                  |                                                                                                                                                                                               |
| Psoriasis                            | 696.1                                                                            |                                                                                                                                                                                               |
| Eczema, Atopic or Contact Dermatitis | 692.9, 691.8                                                                     |                                                                                                                                                                                               |
| Decubitus Ulcers                     | 707.00–707.09, 707.20–707.25                                                     |                                                                                                                                                                                               |
| HIV/AIDs                             | 042.x–044.x                                                                      |                                                                                                                                                                                               |
| Hematological Malignancy             | 200.0-208.9 (200x, 201x, 202x, 203x, 204x, 205x, 206x, 207x, 208x), 238.4-238.79 |                                                                                                                                                                                               |



## Immunosuppression Algorithm

Patients were deemed immunosuppressed if they fulfilled on of the below three criteria

1- ICD 9 code for HIV/AIDs OR Hematologic Malignancy OR Other Immune Conditions (Table E4)

2-Metastatic Cancer, Solid/System/Neuroendocrine Tumor without Metastasis, Organ Transplant, Organ complications present on admission for transplant, Rheumatology (Table E4) + Chemo or Immune-Modulating Agent (Table E5)

3- Chronic Steroids ICD 9 code (V58.65) + Systemic Steroids (table E5)

**Table E3: ICD-9-CM Codes for Immunosuppressed Algorithm**

| Condition                                             | ICD 9- code                                                                                                            |                                  |
|-------------------------------------------------------|------------------------------------------------------------------------------------------------------------------------|----------------------------------|
| HIV/AIDs                                              | 042.x-044.x                                                                                                            |                                  |
| Hematological Malignancy                              | 200.0-208.9 (200x, 201x, 202x, 203x, 204x, 205x, 206x, 207x, 208x),<br>238.4-238.79                                    |                                  |
| <b>Other Immune Conditions</b>                        |                                                                                                                        |                                  |
| Sickle Cell Disease                                   | 282.41, 282.42, 282.6x,                                                                                                |                                  |
| Asplenia                                              | 759.0                                                                                                                  |                                  |
| Nephrotic syndrome                                    | 581.9, 581.0, 581.1, 581.2, 581.3, 581.81                                                                              |                                  |
| Immunoglobulin deficiency                             | 279.00, 279.03, 279.2, 279.04, 279.06, 279.11, 279.02                                                                  |                                  |
| Myelofibrosis                                         | 289.83                                                                                                                 |                                  |
| WBC Diseases                                          | 288.1, 288.2, 288.5, 288.8, 288.9                                                                                      |                                  |
| Neutropenia                                           | 288.04, 288.00                                                                                                         |                                  |
| <b>Other Immunosuppressive conditions of Interest</b> |                                                                                                                        |                                  |
| Metastatic Cancer                                     | 196-199.0 (196x, 197x, 198x, 199.0)                                                                                    |                                  |
| Solid or Neuroendocrine Tumor without Metastasis      | 140.x-195.8, 209.0x-209.3x, 235.0-238.5, 238.8-239.0                                                                   |                                  |
| Rheumatological/Inflammatory                          | 135, 277.3x (277.30, 277.31, 277.39) 340x, 341.0, 357.0, 446x 495.9, 555.6x, 695.4, 696x, 710x, 712x, 714x, 720x, 725x |                                  |
| Solid Organ transplant (w and w/out complication)     | <b>Kidney</b>                                                                                                          | V42.0, 55.61, 55.69              |
|                                                       | <b>Heart</b>                                                                                                           | V42.1, 37.51                     |
|                                                       | <b>Liver</b>                                                                                                           | V42.7, 50.51, 50.59              |
|                                                       | <b>Lung</b>                                                                                                            | V42.6, 33.50, 33.51, 33.52, 33.6 |
|                                                       | <b>Pancreas</b>                                                                                                        | V42.83, 52.8-x                   |

|                                    |                              |                                                                                  |
|------------------------------------|------------------------------|----------------------------------------------------------------------------------|
|                                    | <b>Intestine</b>             | V42.84 , 46.97, 996.87                                                           |
| Hematopoietic cell transplantation | <b>Peripheral stem cells</b> | V42.82, Z94.84, 41.01, 41.04, 41.07,<br>41.09, 41.02, 41.03, 41.05, 41.06, 41.08 |
|                                    | <b>Bone Marrow</b>           | V42.81, 41.00, 41.01, 41.09, 41.02, 41.03                                        |

### Debridement codes

Debridement within three days was included in sensitivity analysis as a variable to control for when examining mortality among SSTI/MSK subgroup of patients. Debridement was determined by ICD 9/10 codes.

**Table E4: ICD-9 Procedure Codes for Surgical Debridement and/or Amputation**

| <b>Diagnosis</b>                                        | <b>ICD-9 Code</b> |
|---------------------------------------------------------|-------------------|
| Abdominal Wall Incision                                 | 54.0              |
| Destruction of Abdominal Wall Lesion                    | 54.3              |
| Scrotal Lesion Destruction                              | 61.3              |
| Amputation Stump Revision                               | 84.3              |
| Other Local Destruction Skin                            | 86.3              |
| Myotomy                                                 | 83.02             |
| Soft Tissue Incision not elsewhere classified           | 83.09             |
| Fasciotomy                                              | 83.14             |
| Soft Tissue Division not elsewhere classified           | 83.19             |
| Open Biopsy Soft Tissue                                 | 83.21             |
| Excision of Soft Tissue Lesion not elsewhere classified | 83.39             |
| Other Fasciectomy                                       | 83.44             |
| Other Myectomy                                          | 83.45             |
| Other Soft Tissue Excision                              | 83.49             |
| Muscle or Fascia Graft                                  | 83.82             |
| Toe Amputation                                          | 84.11             |
| Amputation Through Foot                                 | 84.12             |
| Below Knee Amputation not elsewhere classified          | 84.15             |
| Above Knee Amputation                                   | 84.17             |
| Other Skin & Subcutaneous Incision & Drainage           | 86.04             |
| Excisional debridement of wound, infection, or burn     | 86.22             |
| Non-excisional debridement of wound, infection or burn  | 86.28             |
| Heterograft to Skin                                     | 86.65             |
| Homograft to Skin                                       | 86.66             |
| Dermal Regeneration Graft                               | 86.67             |
| Free Skin Graft not elsewhere classified                | 86.69             |
| Dressing of Wound not elsewhere classified              | 93.57             |
| Wound Irrigation not elsewhere classified               | 96.59             |

### eAppendix 3. Methods: *Study Medications*

For purposes of case-finding criteria we included the defined below list of antibiotics as  $\beta$ -lactams. Antibiotics were deemed within window if administered within 3 days of culture sampling. Patients who received other toxin inhibitor antibiotics were excluded (Figure 1).

We only included intravenous administrations of vasopressors. The five vasopressors of interest were Norepinephrine, Epinephrine, Dopamine, Vasopressin, and Phenylephrine.

Immunosuppressive medication were considered as part of our immunosuppression algorithm if patient received medication during index admission.

**Table E5: Study Medication**

| Medication       | Name                                                                                                                                                                                                                                                                                                                                                                                    |
|------------------|-----------------------------------------------------------------------------------------------------------------------------------------------------------------------------------------------------------------------------------------------------------------------------------------------------------------------------------------------------------------------------------------|
| $\beta$ -lactams | aztreonam<br>amoxicillin<br>amoxicillin/clavulanate<br>ampicillin<br>ampicillin/sulbactam<br>cloxacillin<br>cefepime<br>ceftazidime<br>ceftazidime/avibactam<br>ceftaroline<br>cefaclor<br>cefadroxil<br>cefamandole<br>cefazolin<br>cefotetan<br>cefoxitin<br>cefprozil<br>cefuroxime<br>cefdinir<br>cefditoren<br>cefixime<br>cefoperazone<br>cefotaxime<br>cefpodoxime<br>ceftibuten |

|                                         |                                                                                                                                                                                                                                                                                                                                                                                  |
|-----------------------------------------|----------------------------------------------------------------------------------------------------------------------------------------------------------------------------------------------------------------------------------------------------------------------------------------------------------------------------------------------------------------------------------|
|                                         | ceftizoxime<br>ceftriaxone<br>cephalexin<br>cephapirin<br>dicloxacillin<br>piperacillin/tazobactam<br>ticarcillin/clavulanate<br>doripenem<br>ertapenem<br>meropenem<br>ticarcillin<br>cinoxacin<br>mezlocillin<br>nafcillin<br>oxacillin<br>penicillin<br>piperacillin                                                                                                          |
| Clindamycin                             | clindamycin                                                                                                                                                                                                                                                                                                                                                                      |
| Other toxin inhibitor antibiotics       | linezolid , tedizolid                                                                                                                                                                                                                                                                                                                                                            |
| Vasopressor                             | norepinephrine, phenylephrine, epinephrine, dopamine, vasopressin                                                                                                                                                                                                                                                                                                                |
| <b>Immunosuppressive medication</b>     |                                                                                                                                                                                                                                                                                                                                                                                  |
| <b>Monoclonal antibodies:</b>           | alemtuzumab; bevacizumab; cetuximab; gemtuzumab; ibritumomab; ipilimumab; ofatumumab; panitumumab; pertuzumab; rituximab; tositumomab and iodine; trastuzumab.                                                                                                                                                                                                                   |
| <b>Chemotherapy : Alkylating Agents</b> | busulfan; dacarbazine; estramustine phos sodium; altretamine; bendamustine hydrochloride; thiotepa; chlorambucil; cyclophosphamide; ifosfamide; ifosfamide/mesna; mechlorethamine; melphalan; uracil mustard; carmustine; lomustine; streptozocin.                                                                                                                               |
| <b>Chemotherapy : antibiotics</b>       | amsacrine; daunorubicin; daunorubicin citrate liposome; doxorubicin; doxorubicin hcl liposome; epirubicin; idarubicin; bleomycin sulfate; dactinomycin; mitomycin; plicamycin                                                                                                                                                                                                    |
| <b>Other</b>                            | mitoxantrone; brentuximab vedotin; arsenic trioxide; bortezomib; carfilzomib; everolimus; mitotane; porfimer; pralatrexate; sipuleucel-t; sorafenib; temozolomide; vorinostat; erlotinib; gefitinib; tretinoin; romidepsin; dasatinib; imatinib; lapatinib; nilotinib; pazopanib; sunitinib; temsirolimus; bexarotene; aldesleukin; denileukin diftitox; levamisole; amifostine; |

|                                   |                                                                                                                                                                                                                                                                                                                                                                                                                                                                                                                                                                                                                                                                                                                                 |
|-----------------------------------|---------------------------------------------------------------------------------------------------------------------------------------------------------------------------------------------------------------------------------------------------------------------------------------------------------------------------------------------------------------------------------------------------------------------------------------------------------------------------------------------------------------------------------------------------------------------------------------------------------------------------------------------------------------------------------------------------------------------------------|
|                                   | dexrazoxane; mesna; azacitidine; decitabine; nelarabine; irinotecan; topotecan; asparaginase; pegaspargase; etoposide.                                                                                                                                                                                                                                                                                                                                                                                                                                                                                                                                                                                                          |
| <b>Chemotherapy: Antimitotics</b> | eribulin mesylate; ixabepilone; cabazitaxel; docetaxel; paclitaxel; vinblastine; vincristine; vinorelbine.<br>amsacrine; daunorubicin; daunorubicin citrate liposome; doxorubicin; doxorubicin hcl liposome; epirubicin; idarubicin; bleomycin sulfate; dactinomycin; mitomycin; plicamycin.                                                                                                                                                                                                                                                                                                                                                                                                                                    |
| <b>Systemic Sterioids</b>         | betamethasone; budesonide; dexamethasone; methylprednisolone; methylprednisolone; prednisolone; prednisone; triamcinolone                                                                                                                                                                                                                                                                                                                                                                                                                                                                                                                                                                                                       |
| <b>Anti-metabolites</b>           | methotrexate; pemetrexed; cladribine; clofarabine; fludarabine phos; mercaptopurine; pentostatin; thioguanine; capecitabine; cytarabine <sup>4</sup> ; cytarabine (lipo); floxuridine; fluorouracil; gemcitabine.                                                                                                                                                                                                                                                                                                                                                                                                                                                                                                               |
| <b>Immune modulating agents</b>   | belimumab; denosumab; eculizumab; palivizumab; auranofin; aurothioglucose; gold sodium thiomalate; leflunomide; abatacept; adalimumab; anakinra; certolizumab pegol; etanercept; fingolimod; golimumab; infliximab; interferon alfa-2a; interferon alfa-2b; interferon alfa-n3; interferon alfacon-1; interferon beta-1a; interferon beta-1b; interferon gamma-1b; lenalidomide; natalizumab; peginterferon alfa-2a; peginterferon alfa-2b; thalidomide; tocilizumab; ustekinumab; pegademase bovine; alefacept; azathioprine; basiliximab; belatacept; cyclosporine; daclizumab; efalizumab; glatiramer acetate; muromonab-c; tacrolimus; mycophenolate mofetil; mycophenolic acid sodium; sirolimus; rapamycin; thymoglobulin |

#### **e-Appendix 4: Methods: *Sequential Organ Failure Assessment (SOFA) score***

SOFA scores were calculated as previously described<sup>5</sup>

#### **e-Appendix 5: Methods: *Analysis***

For the comparison of baseline characteristics between clindamycin and non-clindamycin groups, the p-values for categorical variables were computed by chi-squared tests (or in the case of expected frequencies <5, Fisher's exact test) and for continuous variables by Wilcoxon rank sum test. For the matched data, Friedman's test was used to compare the continuous variables and the Cochran-Mantel-Haenszel test was used to compare the categorical variables between treatment groups.

To estimate the effect of clindamycin on mortality, propensity score matching was carried out using the R package Matchit. Specifically, Propensity scores were calculated from a logistic regression model that is relating clindamycin group status as a binary outcome to the matching variables as predictors. All variables in Table 1, except specific  $\beta$ -lactam therapy received, were included in the model. Age, Sequential Organ Failure Assessment (SOFA) and Elixhauser scores were included as continuous variables.

Clindamycin patients were matched 2:1 to a non-clindamycin patient with a similar logit of the propensity scores by nearest neighbor method with a caliper of 0.2 in the two cohorts (group A streptococcus [GAS] and non-group A, non-group B  $\beta$ -hemolytic streptococcus [NABS])<sup>6</sup>. Specifically, a non-clindamycin patient was randomly selected as the match if its logit of the propensity score falls within 0.2 of the standard deviation of the logit of the propensity scores from a clindamycin patient. Propensity score matching was executed in concert with exact matching for the following prioritized variables to enrich selection of cases with  $i\beta$ HS disease of clinical importance: presence of ICD-9 code of necrotizing fasciitis; (See Table E2 for list of ICD-9 codes), vasopressor use (Table E3), ICU stay and proven  $i\beta$ HS.

For the primary outcome measure, in-hospital mortality, logistic regression analysis was performed on the matched data to examine the effect of clindamycin and other risk covariates. Odds ratio (OR) and the associated 95% confidence intervals for clindamycin vs. Non-clindamycin mortality were reported.

Seven subset sensitivity analyses were conducted to examine the effect of clindamycin on mortality in a subset of clinically relevant patients in the matched cohort. The subset sensitivity analyses included patients: Subgroup analyses in both cohorts were performed on patients with proven infections alone; probable infections alone; (3) skin/soft tissue /musculoskeletal (SST/MSK) infections—adjusted for source control or debridement; (4) ICU stay; (5) vasopressor use within 1 day of index culture; (6) necrotizing fasciitis; <sup>7</sup> neither vasopressor-dependent shock nor necrotizing fasciitis (8) early clindamycin use (i.e. within  $\pm 1$  day of culture sampling) and; (9) > 1, >2 and >3 days of clindamycin .

Primarily the matched data was analyzed with logistic regression models without adjusting for the matching nature of the data.<sup>8,9</sup> However, matched approaches such as conditional logistic regression or the generalized estimating equations (GEE)<sup>10</sup> are also proposed to account for the dependence among the subjects within each propensity score matched block. Thus, we further conducted sensitivity analysis utilizing the GEE approach. This approach was found relatively more efficient handling data with incomplete matching blocks<sup>11</sup>, which was the case in our data.

Based on the matched cohort, secondary outcome of length of stay was compared between the two treatment groups in both cohorts (GAS and NABS) with the Wilcoxon rank sum test with continuity correction.

All analysis was conducted were performed using Rstudio <sup>12</sup>

**e-Appendix 6: Results: Overall Cohort Baseline Characteristics**

**Table E6: Baseline Characteristics of All Patients with Invasive  $\beta$ -hemolytic Streptococcal Infection**

| Variable (%)                           | Included patient<br>Non- Clindamycin<br>Group (n=1497) | Included patients<br>Clindamycin<br>Group (n=459) | p-Value | Excluded patients<br>(n=3915) |
|----------------------------------------|--------------------------------------------------------|---------------------------------------------------|---------|-------------------------------|
| Age (Median[IQR])                      | 56 [40,71]                                             | 49 [31,64]                                        | <0.001  | 44 [24, 62]                   |
| Male Sex                               | 941 (62.9)                                             | 265 (57.7)                                        | 0.06    | 2155 (55.0)                   |
| Caucasian Ethnicity                    | 1143 (76.4)                                            | 319 (69.5)                                        | <0.05   | 2653 (67.8)                   |
| Elixhauser Index * (Median[IQR])       | 2.0 [1.0, 4.0]                                         | 2.0 [0.0, 3.0]                                    | <0.05   | 1.0 [0.0, 3.0]                |
| Baseline SOFA Score ^<br>(Median[IQR]) | 1.0 [0.0, 3.0]                                         | 1.0 [0.0, 3.5]                                    | 0.05    | 1.0 [0.0, 3.0]                |
| Proven i $\beta$ HS                    | 828 (55.3)                                             | 257 (56.0)                                        | 0.84    | 768 (19.6)                    |
| i $\beta$ HS pathogen type             |                                                        |                                                   | <0.001  |                               |
| GAS                                    | 736 (49.2)                                             | 343 (74.7)                                        |         | 2282 (58.3)                   |
| NABS                                   | 761 (50.80)                                            | 116 (25.3)                                        |         | 2201 (49.1)                   |
| Site                                   |                                                        |                                                   | <0.001  |                               |
| MSK/SSTI                               | 500 (33.4)                                             | 177 (38.6)                                        |         | 519 (36.4)                    |
| Respiratory                            | 212 (14.2)                                             | 32 (7.0)                                          |         | 187 (13.1)                    |
| Other Deep Infection Site**            | 50 (3.3)                                               | 16 (3.5)                                          |         | 47 (3.3)                      |
| Primary Bacteremia                     | 204 (13.6)                                             | 44 (9.6)                                          |         | 188 (13.1)                    |
| Secondary Bacteremia:                  | 531 (35.3)                                             | 190 (41.4)                                        |         | 485 (34.0)                    |



|                           |             |            |        |             |
|---------------------------|-------------|------------|--------|-------------|
| Necrotizing Fasciitis     | 14 (0.9)    | 46 (8.7)   | <0.001 | 50 (1.3)    |
| ICU Stay                  | 251 (16.8)  | 121 (26.4) | <0.001 | 556 (14.2)  |
| IVIG therapy              | 8 (0.5)     | 29 (6.3)   | <0.001 | 25 (0.6)    |
| Vasopressor‡              | 162 (10.8)  | 94 (20.5)  | <0.001 | 285 (7.3)   |
| Debridement within 3 days | 240 (16.0)  | 127 (27.7) | <0.001 | 425 (10.9)  |
| Immunocompromised†        | 118 (7.9)   | 39 (8.5)   | 0.75   | 291 (7.4)   |
| Obesity                   | 177 (11.8)  | 59 (12.9)  | 0.61   | 352 (9.0)   |
| Community Onset           | 1411 (94.3) | 437 (95.2) | 0.51   | 4071 (90.8) |
| Academic Hospital         | 994 (66.4)  | 307 (66.9) | 0.89   | 2993 (66.8) |
| Urban Hospital            | 1225 (81.8) | 386 (84.1) | 0.30   | 3023 (77.2) |
| Year of Infection         |             |            | 0.35   |             |
| Prior to 2005             | 141 (9.4)   | 39 (8.5)   |        | 495 (12.6)  |
| 2005-2009                 | 539 (36.0)  | 182 (39.7) |        | 1103 (28.2) |
| 2010-2015                 | 817 (54.6)  | 238 (51.9) |        | 2317 (59.2) |
| Geographic Region         |             |            | <0.05  |             |
| Midwest                   | 356 (23.8)  | 81 (17.6)  |        | 850 (21.7)  |
| Northeast                 | 506 (33.8)  | 146 (31.8) |        | 1226 (31.3) |
| South                     | 412 (27.5)  | 138 (30.1) |        | 1389 (35.5) |
| West                      | 223 (14.9)  | 94 (20.5)  |        | 450 (11.5)  |
| Hospital Bed Capacity     |             |            | 0.89   |             |
| Small (<200 beds)         | 347 (23.2)  | 105 (22.9) |        | 884 (22.6)  |
| Medium (200-500 beds)     | 847 (56.6)  | 265 (57.7) |        | 2034 (52.0) |

Large (>500 beds)

303 (20.2)

89 (19.4)

997 (25.5)

---

Abbreviations:  $\beta$ HS:  $\beta$ -hemolytic streptococci, CNS: central nervous system, GAS: Group A *Streptococcus*, GU: genitourinary, ICU: intensive care unit, IQR: interquartile range, IVIG: intravenous immunoglobulin,  $i\beta$ HS: invasive  $\beta$ -hemolytic streptococci, MSK: musculoskeletal, NABS: non-group A or B  $\beta$ -hemolytic streptococci, SSTI: skin and soft tissue infection, SOFA: Sequential Organ Failure Assessment

Data presented as No. (%) unless otherwise indicated. Wilcoxon ranked sum test was used to compare continuous variables and chi-square test was used to compare the categorical variables.

\* The Elixhauser score was calculated using ICD-9-CM codes (Supplementary Table-E3). Adapted from: Quan H, Sundararajan V, Halfon P, Fong A, Burnand B, Luthi JC, Saunders LD, Beck CA, Feasby TE, Ghali WA. Coding Algorithms for Defining Comorbidities in ICD-9-CM and ICD-10 Administrative Data. *Med Care*. 2005 Nov;43(11):1130-9

^ Using an electronic health record-based adaption of the original Sequential Failure Assessment (SOFA) (Supplementary Table E8)

† Based on ICD 9 codes, algorithm can be found in supplementary document

‡ Norepinephrine, epinephrine, phenylephrine, dopamine within (+/-) 24 hours of culture

Other deep infections: include mediastinitis, orchitis/epididymitis, parapharyngeal abscess, periapical abscess, peritonsillar abscess, retropharyngeal abscess, abscess of mediastinum, abscess of salivary gland

## e-Appendix 7: Results: Sensitivity Analysis, Odds Ratio of In-Hospital Mortality Using Generalized Estimating Equations

Figure E1: GAS Cohort

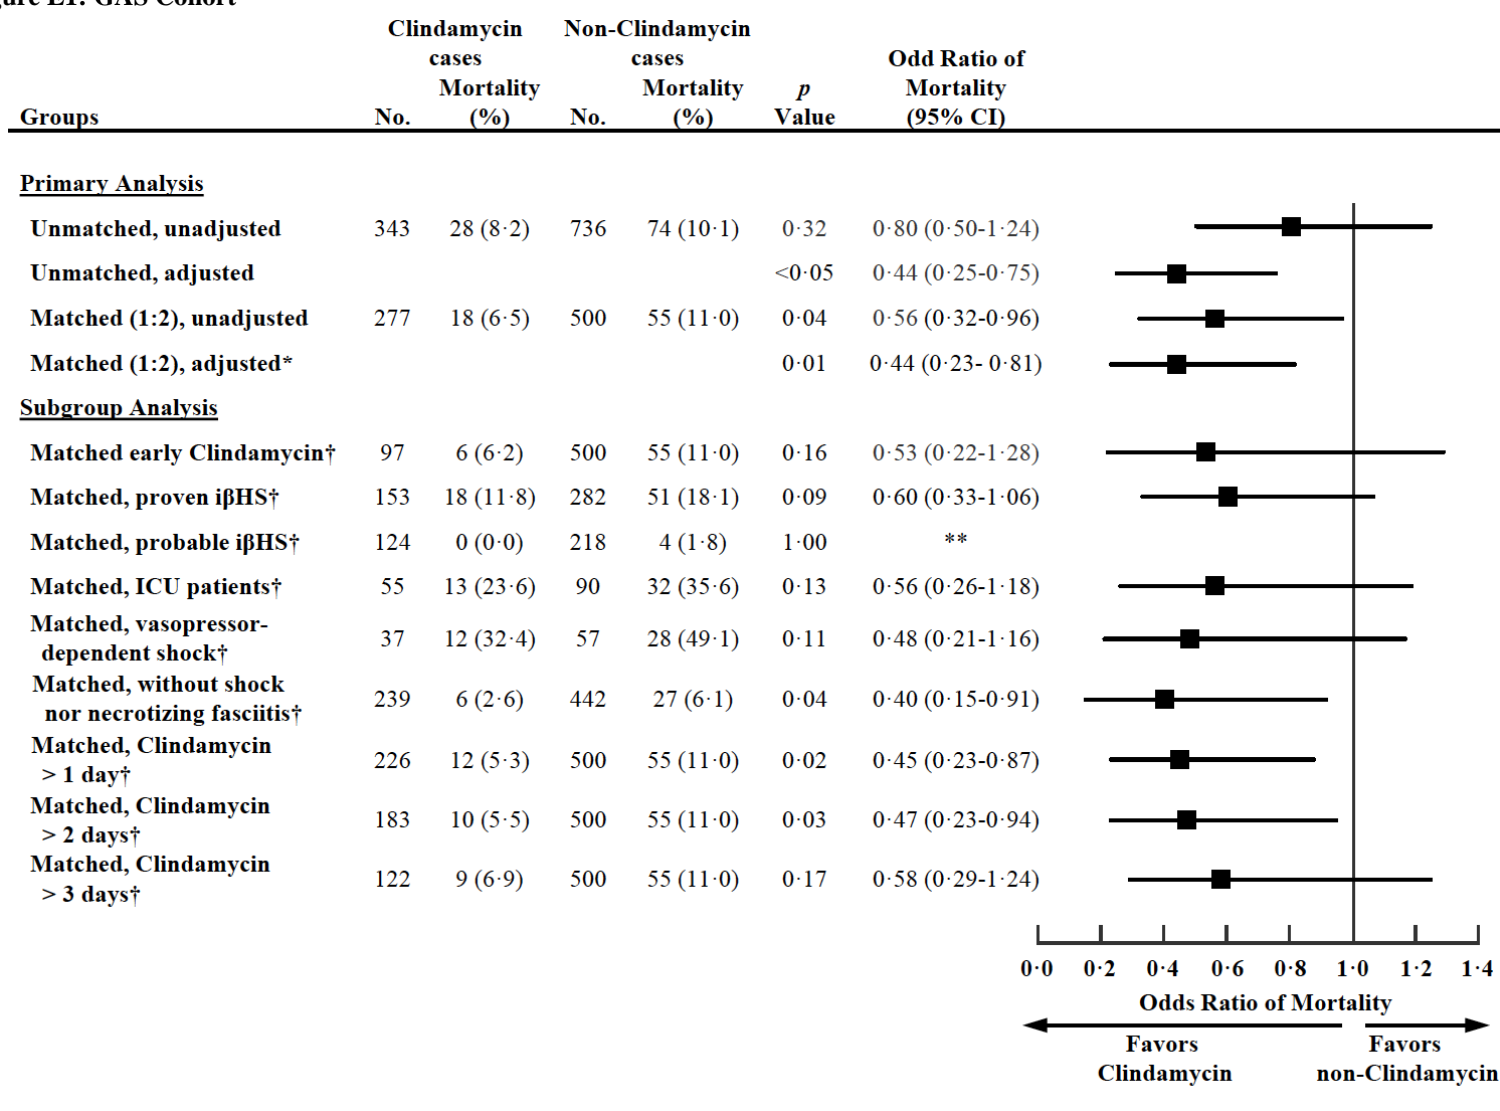

Abbreviations: CI: confidence intervals, GAS: group A *Streptococcus*, ICU: intensive care unit, iβHS: invasive β-hemolytic streptococci, OR: odds ratio

\* primary analysis adjusted for proven iβHS, vasopressor-dependent shock and ICU status

Figure E1 Legend: The figure reports the odds ratios (ORs) of in-hospital mortality and 95% confidence intervals in the unmatched and unadjusted analysis, matched and unadjusted analysis, and primary analysis conducted using generalized estimating equations (GEE)<sup>10</sup> (matched and by logistic regression), as well as subgroup analysis on propensity matched pairs of the GAS cohort.

Figure E2: NABS Cohort

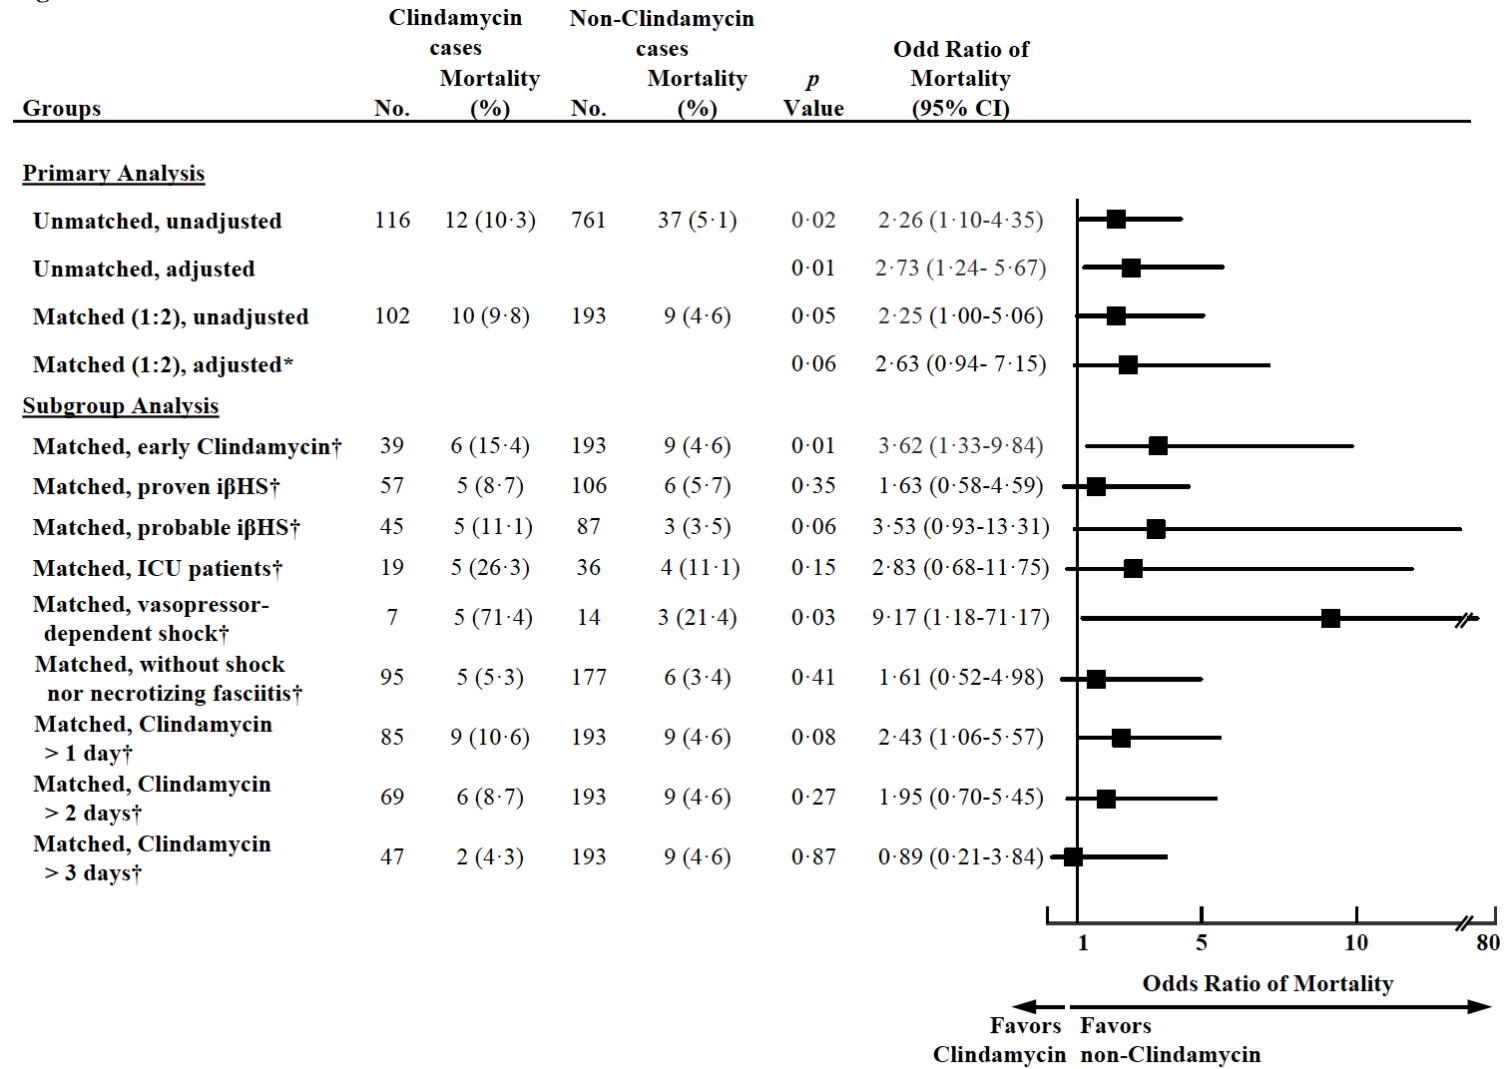

Abbreviations: CI: confidence intervals, ICU: intensive care unit, i $\beta$ HS: invasive  $\beta$ -hemolytic *streptococci*, NABS: Non-group A/B  $\beta$ -hemolytic *streptococci*, OR: odds ratio

\* primary analysis. Adjusted for proven i $\beta$ HS, vasopressor-dependent shock and ICU status

† subgroup analysis

Figure E2 Legend: The figure reports the odds ratios (ORs) of in-hospital mortality and 95% confidence intervals in the unmatched and unadjusted analysis, matched and unadjusted analysis, and primary analysis conducted using generalized estimating equations (GEE)<sup>10</sup> (matched and by logistic regression), as well as subgroup analysis on propensity matched pairs of the NABS cohort

**e-Appendix 8: Results: Mortality over time**

**Table E7: Mortality Over Time Among Invasive  $\beta$ -hemolytic Streptococcal Infection**

| Time Period | GAS                      |                      | NABS                     |                      |
|-------------|--------------------------|----------------------|--------------------------|----------------------|
|             | Non-Clindamycin<br>n=500 | Clindamycin<br>n=277 | Non-Clindamycin<br>n=193 | Clindamycin<br>n=102 |
| 2000-2005   | 5 (10.4)                 | 3 (10.7)             | 0 (0)                    | 0 (0)                |
| 2005-2009   | 17 (9.8)                 | 7 (6.7)              | 5 (5.6)                  | 5 (10.4)             |
| 2010-2015   | 33 (11.8)                | 8 (5.5)              | 4 (4.3)                  | 5 (10.6)             |

Percentages are reported in parenthesis. Abbreviations GAS: group A *Streptococcus*, NABS: non-group A/B  $\beta$ -hemolytic streptococci

### **e-Appendix 9: Results: *Clindamycin Resistance***

Susceptibility testing results were available for 20% (n=[1172/5953]; GAS: 19% (496/2570), NABS:20% [676/3383]). Of those tested, 13% (156/1172) exhibited resistance or intermediate susceptibility to clindamycin and were removed from further analysis. Within the cohort whom underwent matching (n=1956) susceptibility testing results was present for 24% (469/1956) of patients (GAS: 25% [276/1079], NABS: 22% [196/877])

Among excluded patients with isolates which exhibited resistance or intermediate susceptibility bases (n=156), rates of resistance were significantly higher in NABS isolates compared to GAS isolates (16% [80/492] vs. 11% [76/669], p=0.02). Among NABS the percentage of resistance isolates increased significantly over the three time periods (3% [1/33] vs. 11% [11/93] vs. 19% [68/286]; p=0.01), which was not the case for GAS (2000-2005: 7%[4/54] vs. 2005-2010: 9% [14/140] vs. 2010-2015: 13% [58/399]; p=0.25)

Crude mortality among those with resistance/intermediate isolates compared to susceptible isolates was similar among both GAS (3% (10/76) vs. 10% 60/593, p=0.54) and NAB 5% (4/80) vs 7% (30/412), p=0.62)



*Literature Review*

**e-Appendix 10: Table E8: Studies Examining Clinical Efficacy of Adjunctive Clindamycin in iβHS**

| Study                               | Study Design                                       | Case definition                         | Cases           | Deaths/Poor outcome |                 | Univariate or crude OR/RR [95% CI] | Multivariate or adjusted OR/RR [95% CI] | Additional Information                                                                                                                                                                                   |
|-------------------------------------|----------------------------------------------------|-----------------------------------------|-----------------|---------------------|-----------------|------------------------------------|-----------------------------------------|----------------------------------------------------------------------------------------------------------------------------------------------------------------------------------------------------------|
|                                     |                                                    |                                         |                 | Clindamycin         | Non-clindamycin |                                    |                                         |                                                                                                                                                                                                          |
| <b>Group A <i>Streptococcus</i></b> |                                                    |                                         |                 |                     |                 |                                    |                                         |                                                                                                                                                                                                          |
| Kaul et al (1997) <sup>13</sup>     | Observational prospective surveillance             | Necrotizing fasciitis                   | 77 <sup>^</sup> | 12/47 (26%)         | 14/30 (47%)     | 0.55 [0.23-1.02]                   | -                                       | Clindamycin not retained in multivariable model                                                                                                                                                          |
| Kaul et al (1999) <sup>14</sup>     | Comparative observational prospective surveillance | STSS (IVIG treated vs non IVIG treated) | 53 <sup>*</sup> | 15/37 (41%)         | 12/15 (80%)     | 0.21 [0.07-1.00]                   | -                                       | Adjunctive clindamycin use data missing for one patient. Clindamycin not retained in multivariable model                                                                                                 |
| Zimelman et al (1999) <sup>15</sup> | Retrospective cohort                               | iGAS                                    | 19 <sup>†</sup> | 2/12 (17%)          | 6/7 (86%)       | -                                  | -                                       | Results reported for all protein synthesis inhibitors (n=45, of which 39 received clindamycin).                                                                                                          |
| Mulla et al (2003) <sup>16</sup>    | Observational prospective surveillance             |                                         | 195             | -                   | -               | 1.05 [0.49-2.28]                   | 0.58 [0.20-1.74]                        | Among 33 patients with necrotizing fasciitis clindamycin showed statistically significant benefit (aOR 0.11 [0.01-0.89]) but not among 162 patients without necrotizing fasciitis (aOR 1.01 [0.31-3.33]) |
| Mehta et al (2006) <sup>17</sup>    | Observational prospective surveillance             | iGAS (ICU patients)                     | 62              | -                   | -               | Not significant (data not shown)   | -                                       | Clindamycin was not a predictor of mortality in univariate model (ORs not reported) and not included in the multivariate model                                                                           |

|                                             |                                        |                                                                                   |     |             |               |                   |                     |                                                                              |
|---------------------------------------------|----------------------------------------|-----------------------------------------------------------------------------------|-----|-------------|---------------|-------------------|---------------------|------------------------------------------------------------------------------|
| Carapetis et al (2014) <sup>18</sup>        | Observational prospective surveillance | Severe iGAS (necrotizing fasciitis/ STSS/ septic shock/ cellulitis + hypotension) | 84  | 8/53 (15%)  | 12/31 (39%)   | 0.28 [0.10-0.80]  | 0.31 [0.09-1.12]    |                                                                              |
| Linner et al (2014) <sup>19</sup>           | Observational prospective surveillance | STSS                                                                              | 67  | -           | -             | 0.13 [0.04-0.50]  | 0.12 [0.03-0.56]    |                                                                              |
| Couture-Cossette et al (2018) <sup>20</sup> | Retrospective cohort                   | iβHS                                                                              | 249 | 5/128 (4%)  | 15/128 (12%)  | 0.2 [0.04-0.90]** | 0.04 [0.003-0.55]** | ORs are for patient receiving clindamycin within 24hs (mortality: 2/77 (3%)) |
| <b>Non-group A β-hemolytic streptococci</b> |                                        |                                                                                   |     |             |               |                   |                     |                                                                              |
| Couture-Cossette et al (2018) <sup>20</sup> | Retrospective cohort                   | iβHS                                                                              | 304 | 1/23 (4.3%) | 23/281 (8.2%) | 0.51 [0.07-3.96]  | -                   |                                                                              |

Abbreviations: CI: confidence intervals, iβHS: invasive β-hemolytic streptococci, iGAS: invasive group A *Streptococcus*, STSS: streptococcal toxic syndrome OR: odds ratio, RR: relative risk

- missing data

^ Two patients had Group A *Streptococcus* + *S. aureus* isolated. Authors used stepwise backward regression. Model included variables associated with mortality on univariate analysis (including clindamycin). Non-significant variables were eliminated from the MV model, this included adjunctive clindamycin.

\* Adjunctive clindamycin use data missing for one patient

† Overall cases: n=56, deep infection: n=19 (these included bacteremia, osteomyelitis, arthritis, pyomyositis, necrotizing cellulitis or fasciitis). Reported results for protein synthesis antibiotics. In overall cohort the protein synthesis antibiotic used was clindamycin in 39/45 cases. Reported *p* value for favorable outcomes with protein synthesis antibiotic *p*=0.006

^^ Among 33 patients with necrotizing fasciitis clindamycin showed statistically significant benefit (aOR 0.11 [0.01-0.89]) but not among 162 patients without necrotizing fasciitis (aOR 1.01 [0.31-3.33])

\*\* OR for patient receiving clindamycin within 24hs (mortality: 2/77 (3%))

## e-Appendix 11 : References

1. CDC. Case Definitions for Infectious Conditions Under Public Health Surveillance. *MMWR* 1997; **46**(10): 1-55.
2. Quan H, Sundararajan V, Halfon P, et al. Coding algorithms for defining comorbidities in ICD-9-CM and ICD-10 administrative data. *Medical care* 2005; **43**(11): 1130-9.
3. CDC. Tools for Categorizing Injuries using ICD Codes 2007. ([https://www.cdc.gov/nchs/injury/injury\\_tools.htm](https://www.cdc.gov/nchs/injury/injury_tools.htm)). (accessed 12/05/2018).
4. McConville TH, Sullivan SB, Gomez-Simmonds A, Whittier S, Uhlemann AC. Carbapenem-resistant Enterobacteriaceae colonization (CRE) and subsequent risk of infection and 90-day mortality in critically ill patients, an observational study. *PloS one* 2017; **12**(10): e0186195.
5. Rhee C, Jentzsch MS, Kadri SS, et al. Variation in Identifying Sepsis and Organ Dysfunction Using Administrative Versus Electronic Clinical Data and Impact on Hospital Outcome Comparisons. *Critical care medicine* 2019; **47**(4): 493-500.
6. Austin PC. Optimal caliper widths for propensity-score matching when estimating differences in means and differences in proportions in observational studies. *Pharmaceutical statistics* 2011; **10**(2): 150-61.
7. Clinical and Laboratory Standards Institute. M100-S27 Pfast, 27th informational supplement. Wayne, PA: Clinical and Laboratory Standards Institute; 2017. Clinical and Laboratory Standards Institute. M100-S27, Performance standards for antimicrobial susceptibility testing, 27th informational supplement. Wayne, PA: Clinical and Laboratory Standards Institute; 2017, 2017.
8. Stuart EA. Matching methods for causal inference: A review and a look forward. *Stat Sci* 2010; **25**(1): 1-21.
9. Wan F. Matched or unmatched analyses with propensity-score-matched data? *Statistics in medicine* 2019; **38**(2): 289-300.
10. Austin PC. A critical appraisal of propensity-score matching in the medical literature between 1996 and 2003. *Statistics in medicine* 2008; **27**(12): 2037-49.

11. Lin IF, Lai MY, Chuang PH. Analysis of matched case-control data with incomplete strata: applying longitudinal approaches. *Epidemiology (Cambridge, Mass)* 2007; **18**(4): 446-52.
12. Schlager R, Chiu CY, Miller S, et al. Validation of Metagenomic Next-Generation Sequencing Tests for Universal Pathogen Detection. *Archives of Pathology & Laboratory Medicine* 2017; **141**(6): 776-86.
13. Kaul R, McGeer A, Low DE, Green K, Schwartz B. Population-based surveillance for group A streptococcal necrotizing fasciitis: Clinical features, prognostic indicators, and microbiologic analysis of seventy-seven cases. Ontario Group A Streptococcal Study. *Am J Med* 1997; **103**(1): 18-24.
14. Kaul R, McGeer A, Norrby-Teglund A, et al. Intravenous immunoglobulin therapy for streptococcal toxic shock syndrome--a comparative observational study. The Canadian Streptococcal Study Group. *Clinical infectious diseases : an official publication of the Infectious Diseases Society of America* 1999; **28**(4): 800-7.
15. Zimelman J, Palmer A, Todd J. Improved outcome of clindamycin compared with beta-lactam antibiotic treatment for invasive *Streptococcus pyogenes* infection. *The Pediatric infectious disease journal* 1999; **18**(12): 1096-100.
16. Mulla ZD, Leaverton PE, Wiersma ST. Invasive group A streptococcal infections in Florida. *Southern medical journal* 2003; **96**(10): 968-73.
17. Mehta S, McGeer A, Low DE, et al. Morbidity and mortality of patients with invasive group A streptococcal infections admitted to the ICU. *Chest* 2006; **130**(6): 1679-86.

18. Carapetis JR, Jacoby P, Carville K, Ang SJ, Curtis N, Andrews R. Effectiveness of clindamycin and intravenous immunoglobulin, and risk of disease in contacts, in invasive group A streptococcal infections. *Clinical infectious diseases : an official publication of the Infectious Diseases Society of America* 2014; **59**(3): 358-65.
19. Linner A, Darenberg J, Sjolín J, Henriques-Normark B, Norrby-Teglund A. Clinical efficacy of polyspecific intravenous immunoglobulin therapy in patients with streptococcal toxic shock syndrome: a comparative observational study. *Clinical infectious diseases : an official publication of the Infectious Diseases Society of America* 2014; **59**(6): 851-7.
20. Couture-Cossette A, Carignan A, Mercier A, Desruisseaux C, Valiquette L, Pépin J. Secular trends in incidence of invasive beta-hemolytic streptococci and efficacy of adjunctive therapy in Quebec, Canada, 1996-2016. *PloS one* 2018; **13**(10): e0206289-e.
